# Supplementary material for: Maternal smoking and high BMI disrupt thyroid gland development
Source: PubMed Central journal article supplement (PMC6198368; doi:10.1186/s12916-018-1183-7), 2018-10-23

# Supplementary Figure 1

## A. Spread of samples used for fetal thyroid weight measurements

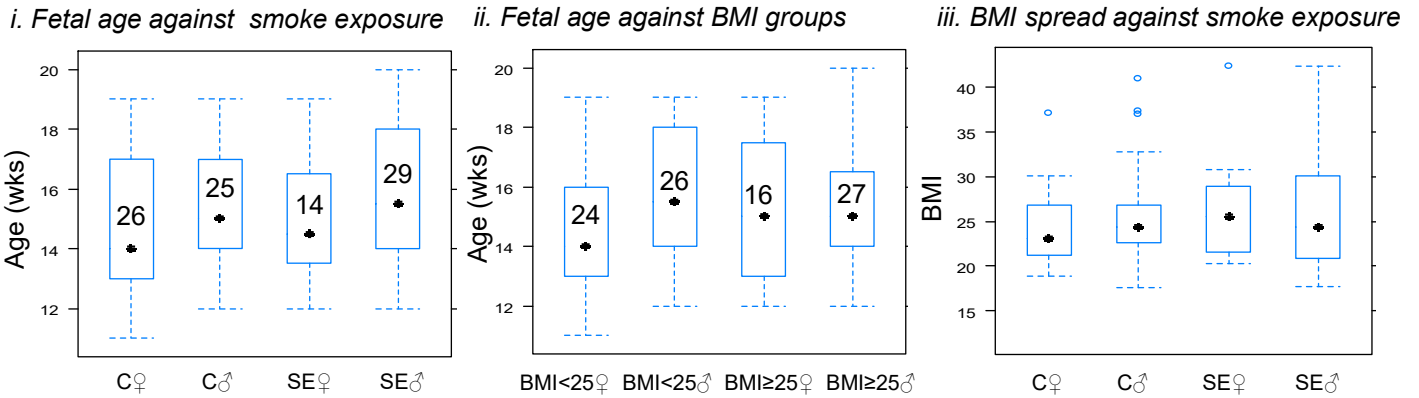

## B. Spread of samples used for fetal plasma hormonal measurements

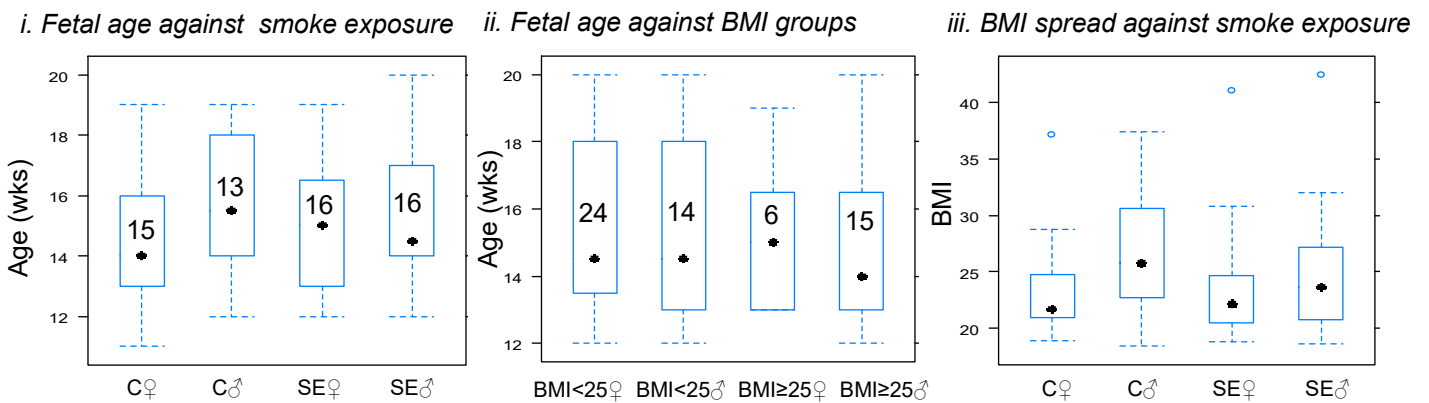

## C. Spread of samples used for determination of circulating thyroid hormone-binding proteins

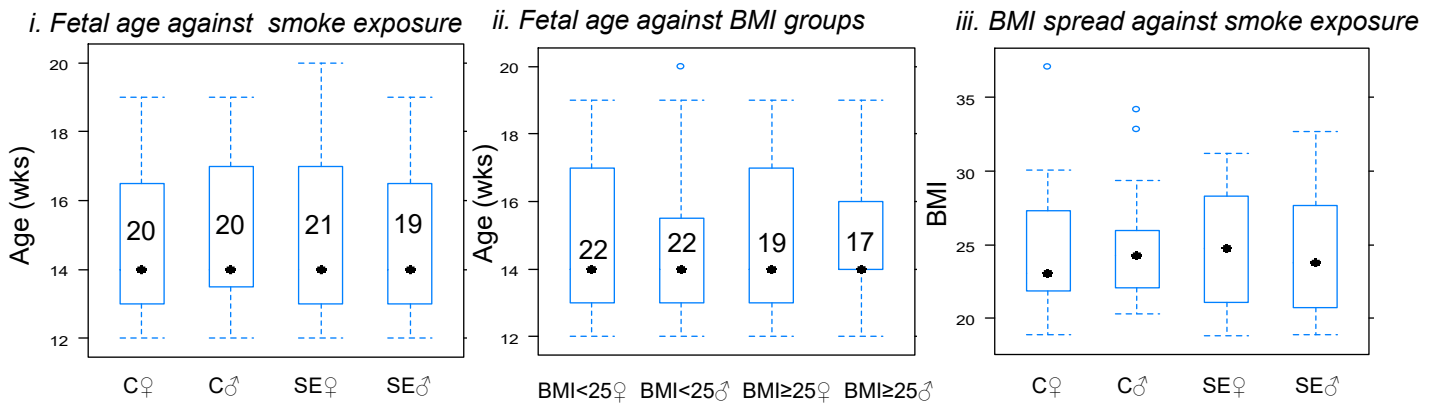

## D. Spread of samples used for fetal thyroid H&E morphology scoring

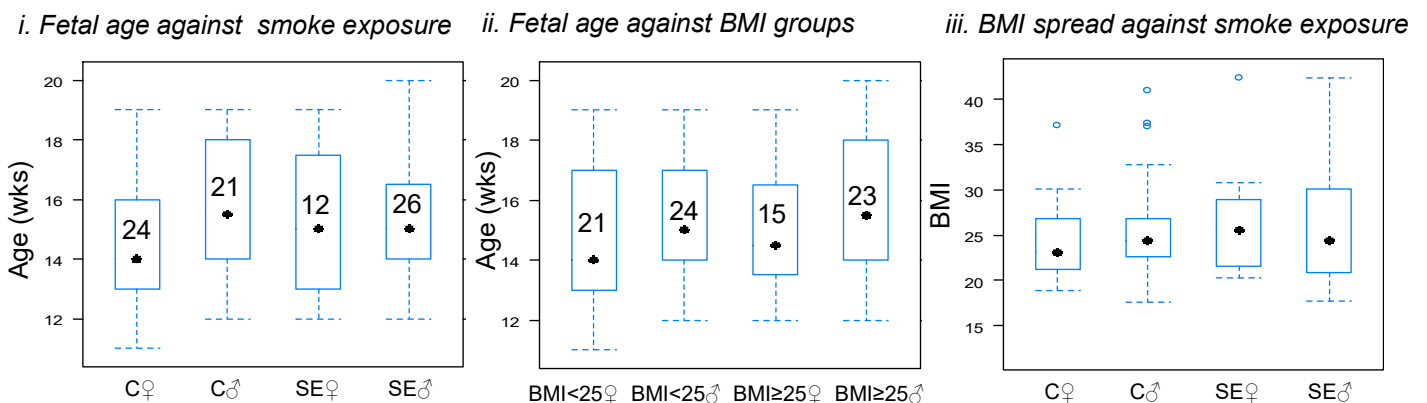

# Supplementary Figure 1 (continued)

## E. Spread of samples used for fetal thyroid immunohistochemical scoring

i. Fetal age against smoke exposure

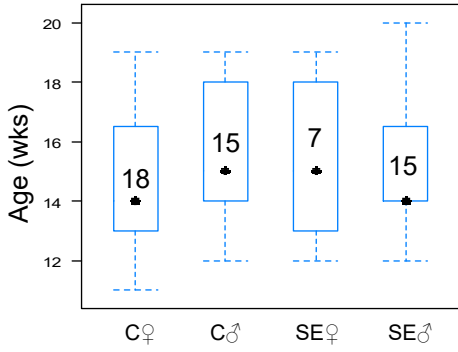

ii. Fetal age against BMI groups

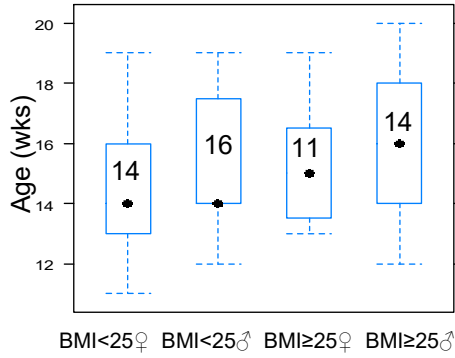

iii. BMI spread against smoke exposure

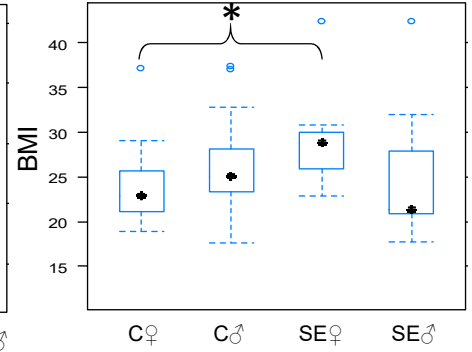

## F. Spread of samples used for fetal thyroid transcript measurements

i. Fetal age against smoke exposure

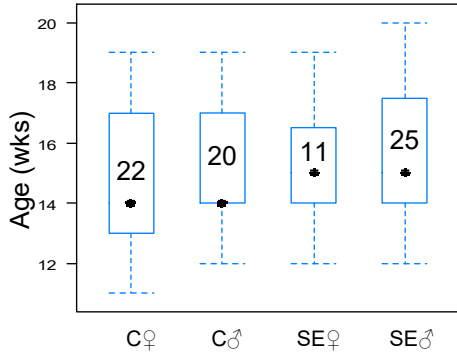

ii. Fetal age against BMI groups

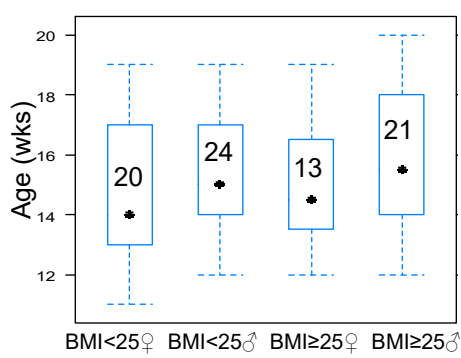

iii. BMI spread against smoke exposure

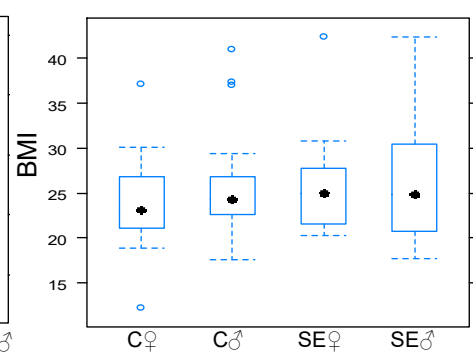

Supplement: 12916_2018_1183_MOESM1_ESM.pdf [file 12916_2018_1183_MOESM1_ESM.pdf]
