# Supplementary material for: Maternal smoking and high BMI disrupt thyroid gland development
Source: PubMed Central journal article supplement (PMC6198368; doi:10.1186/s12916-018-1183-7), 2018-10-23

# Supplementary Figure 2

## A. Sex differences in concentrations of fetal plasma hormones

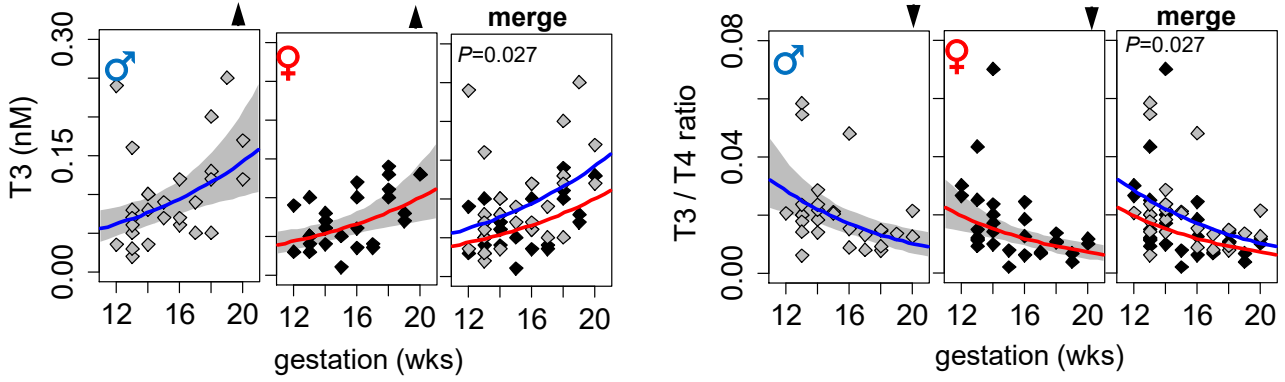

## B. Sex differences in fetal thyroid immunohistochemical staining scores

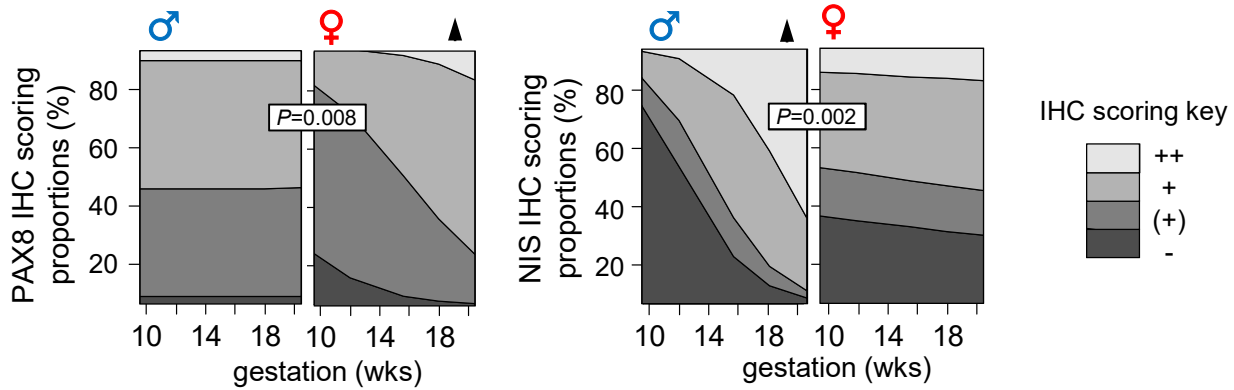

## C. Sex differences in fetal thyroid transcript expression levels

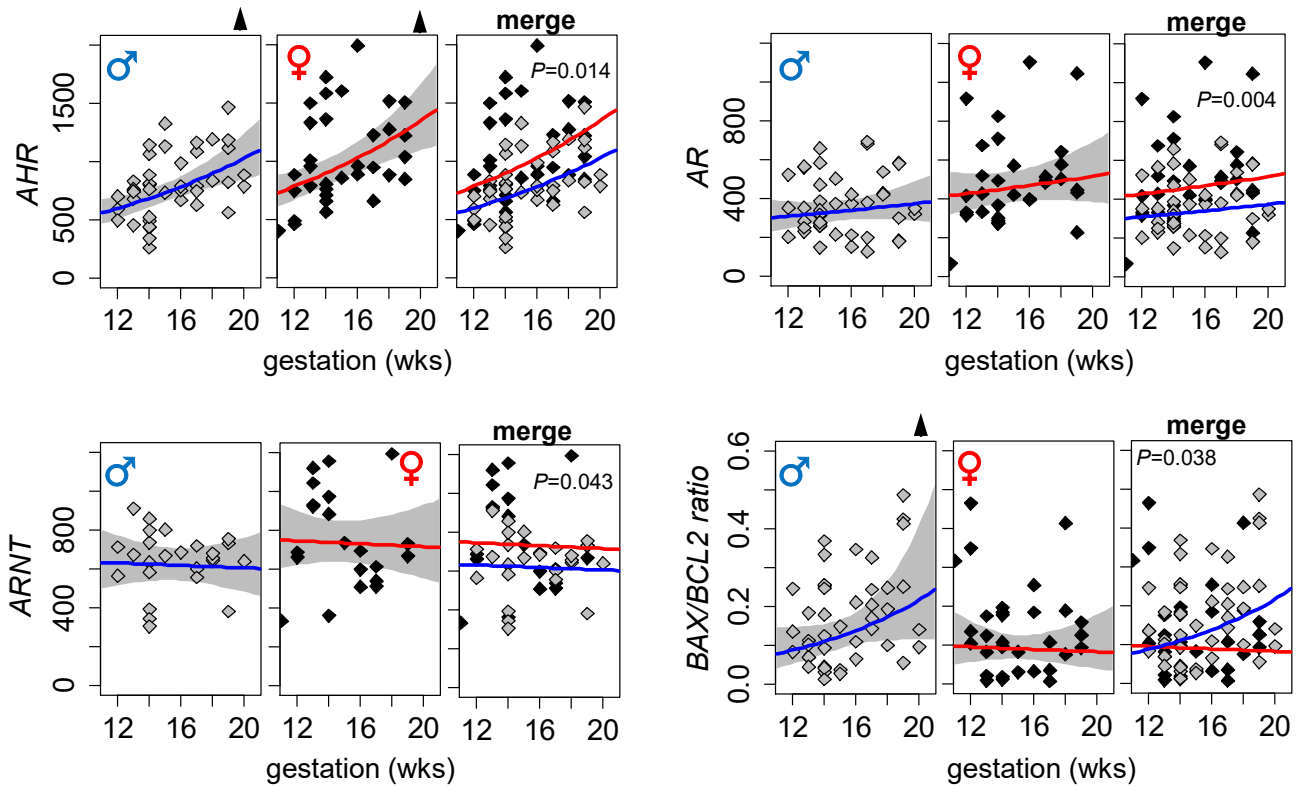

Supplement: 12916_2018_1183_MOESM6_ESM.pdf [file 12916_2018_1183_MOESM6_ESM.pdf]
