# Supplementary material for: Maternal smoking and high BMI disrupt thyroid gland development
Source: Springer Nature journal article supplement (doi:10.1186/s12916-018-1183-7), 2018-10-17

# Supplementary Figure 3

## A. Sex-specific correlations between fetal levels of TSH, cotinine and T4

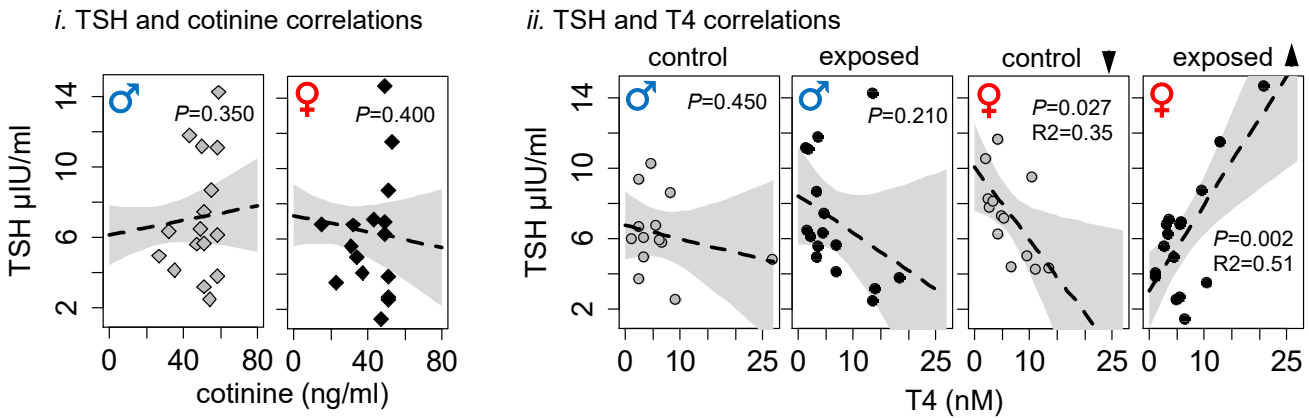

## B. Sex-specific correlation between maternal BMI and circulating fetal TSH levels

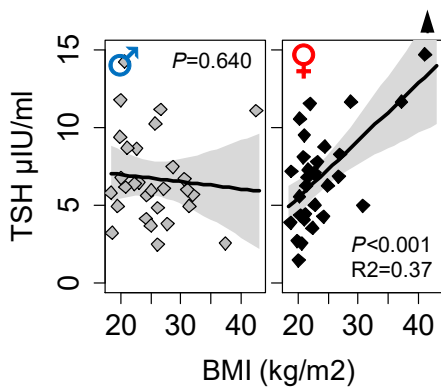

## C. Associations between maternal smoking, maternal BMI and fetal TSH levels in female fetuses

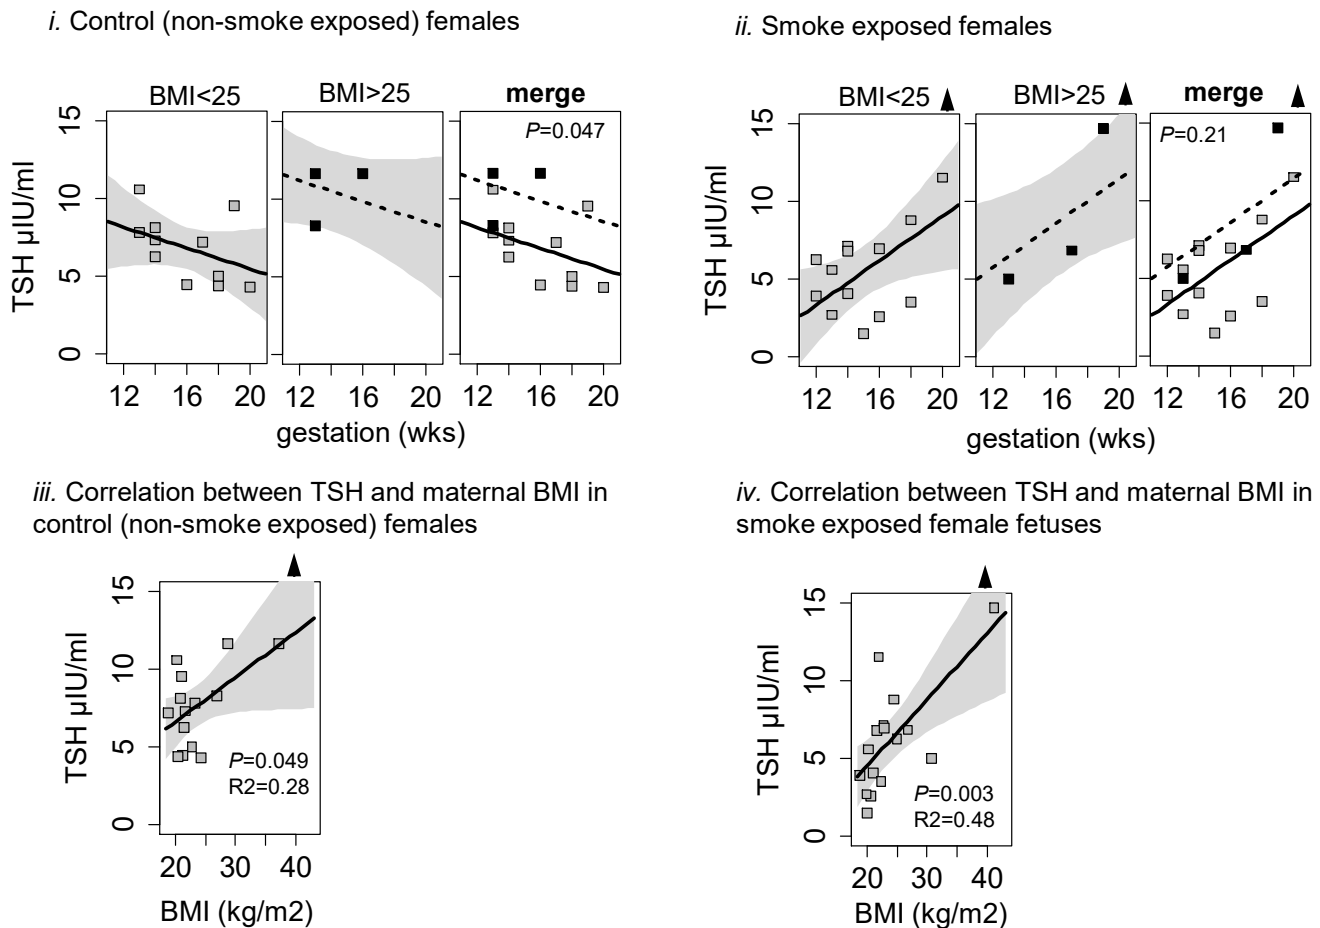

Supplement: MOESM8 [file 16220462]
